# Supplementary material for: Reliability of plasma polar metabolite concentrations in a large-scale cohort study using capillary electrophoresis-mass spectrometry
Source: PubMed Central journal article supplement (PMC5773198; doi:10.1371/journal.pone.0191230), 2018-01-18

**QC\_EPC001\_Gly**

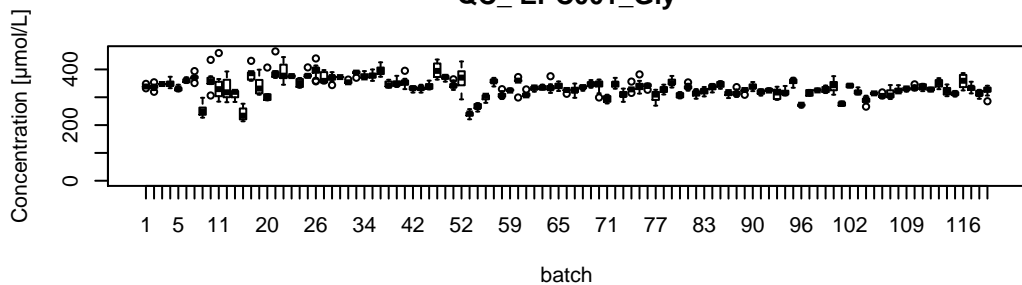

**QC\_EPC002\_Trimethylamine N-oxide**

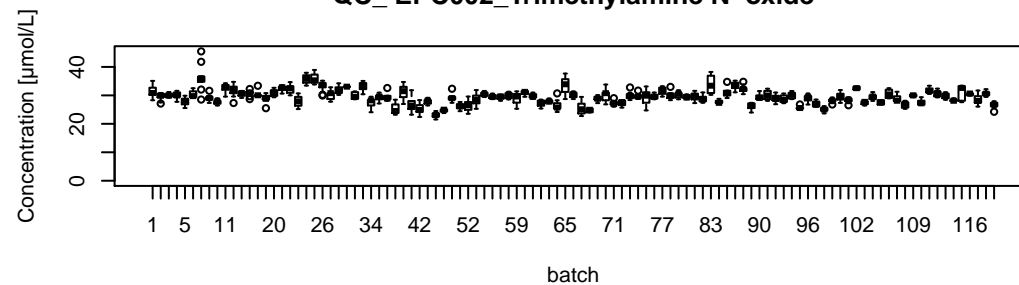

**QC\_EPC003\_beta-Ala**

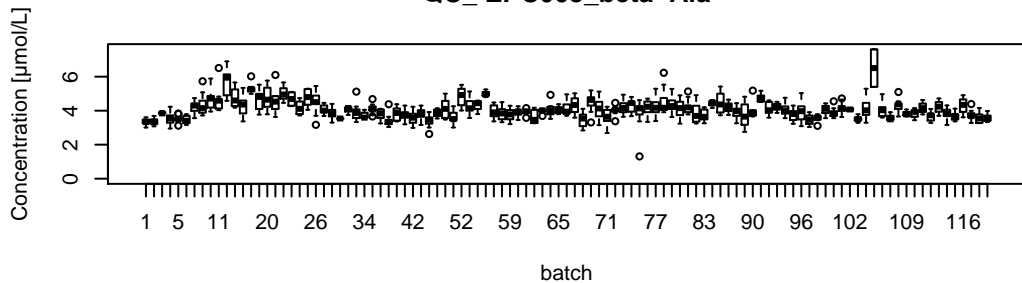

**QC\_EPC004\_Ala**

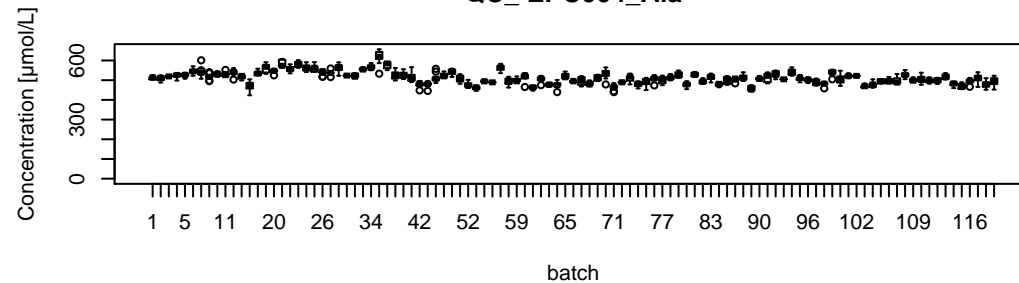

**QC\_EPC005\_Sarcosine**

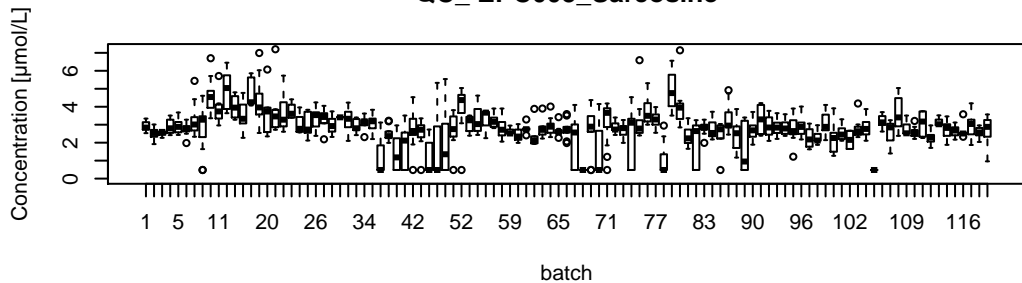

**QC\_EPC006\_3-Aminoisobutyrate**

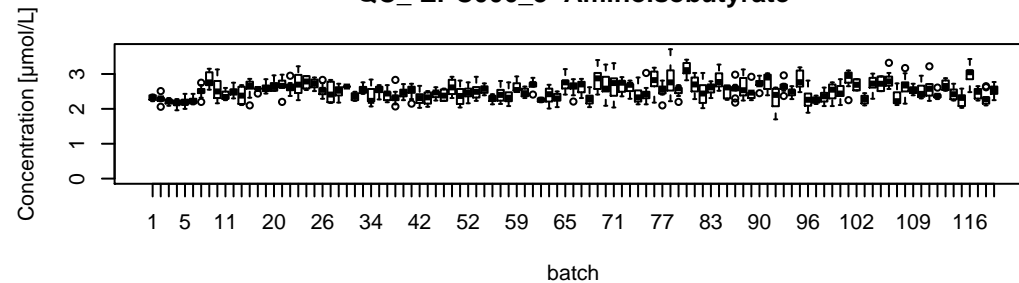

**QC\_EPC007\_2AB**

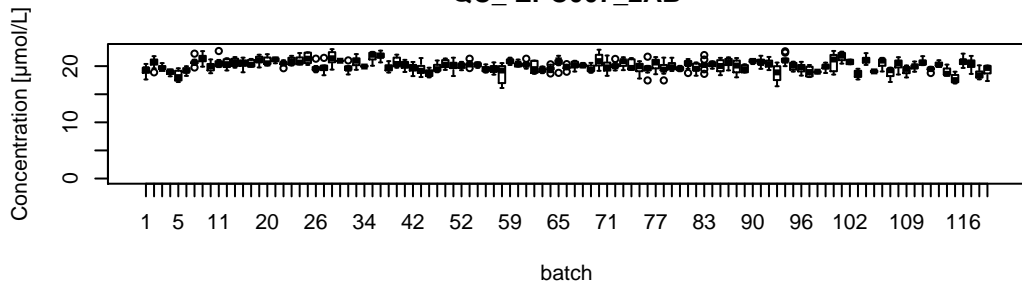

**QC\_EPC008\_N,N-Dimethylglycine**

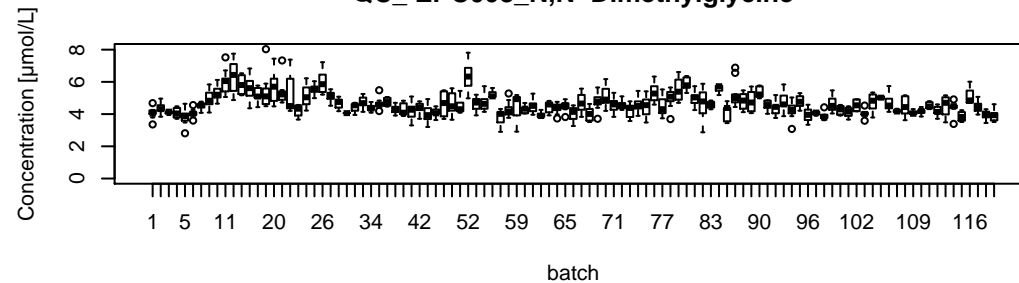

**QC\_EPC009\_Choline**

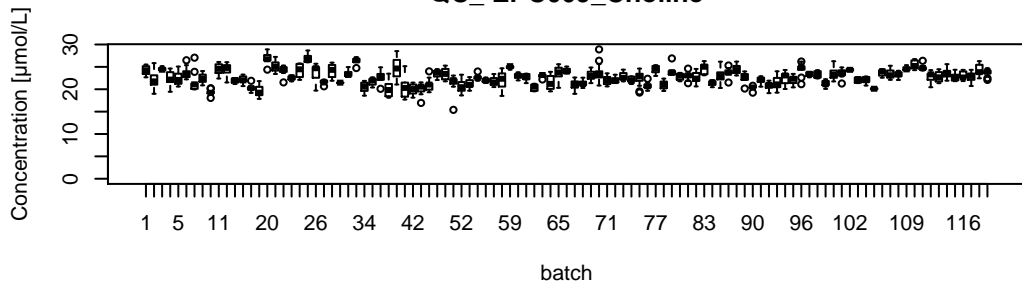

**QC\_EPC010\_Ser**

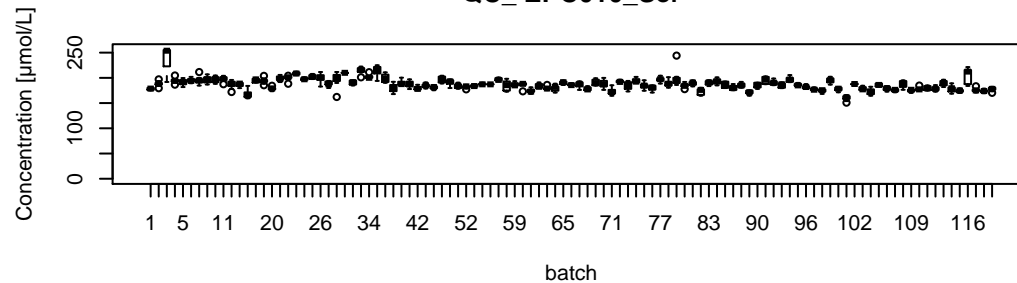

**QC\_EPC011\_Creatinine**

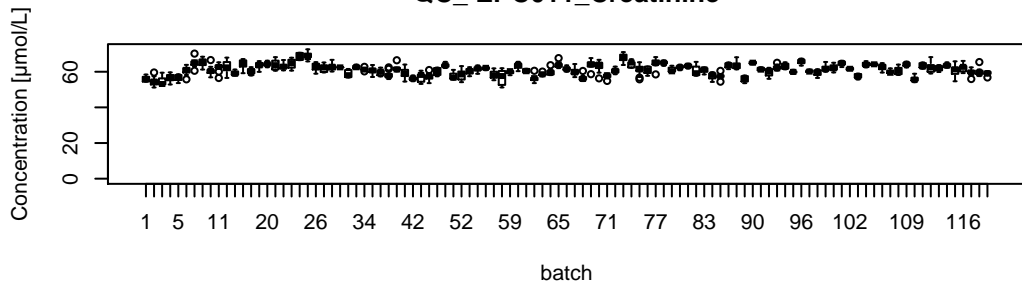

**QC\_EPC012\_Pro**

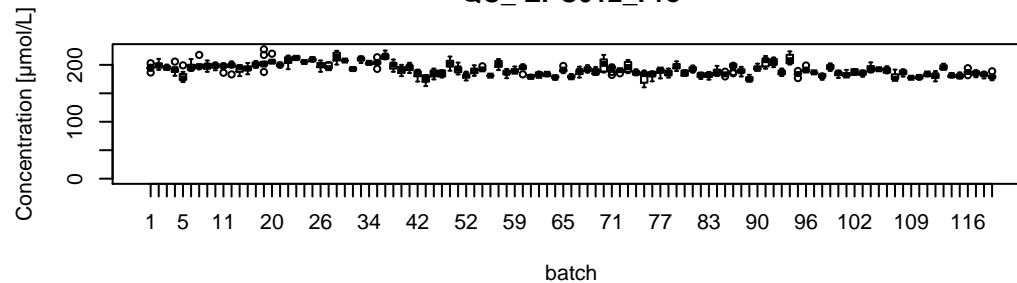

**QC\_EPC013\_Guanidinoacetate**

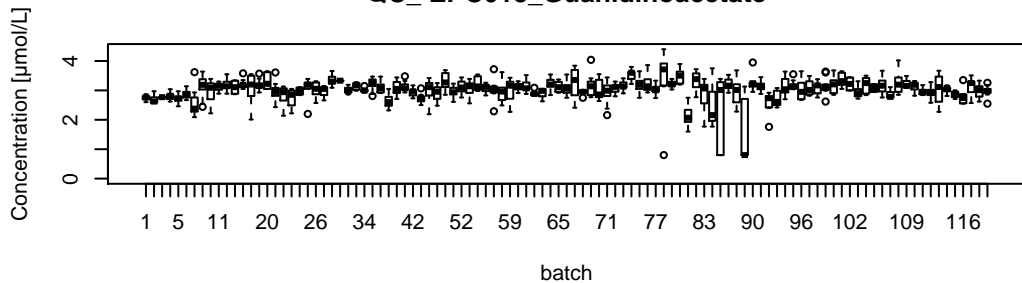

**QC\_EPC014\_Val**

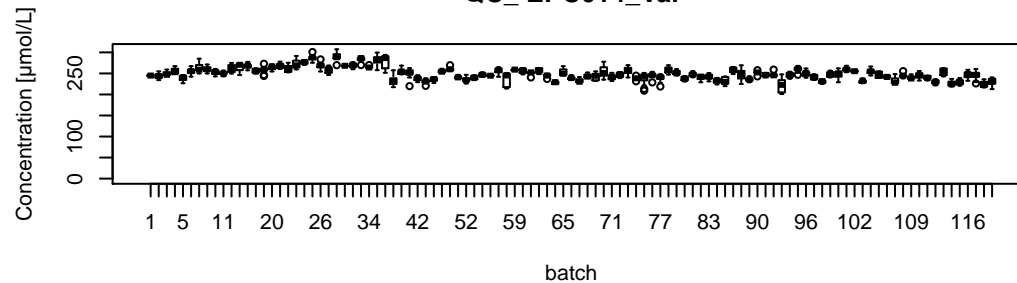

**QC\_EPC015\_Betaine**

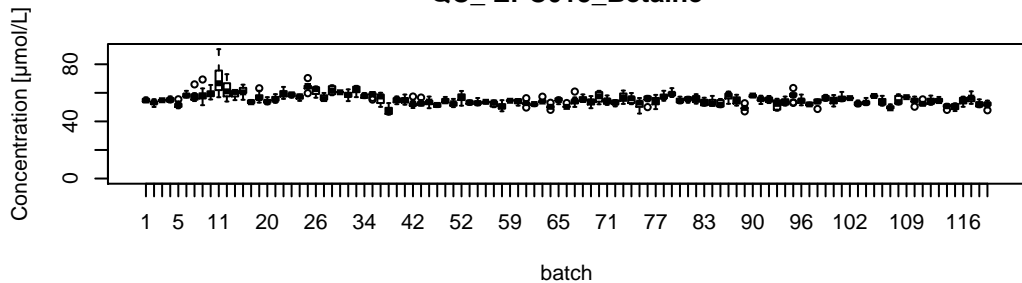

**QC\_EPC016\_Thr**

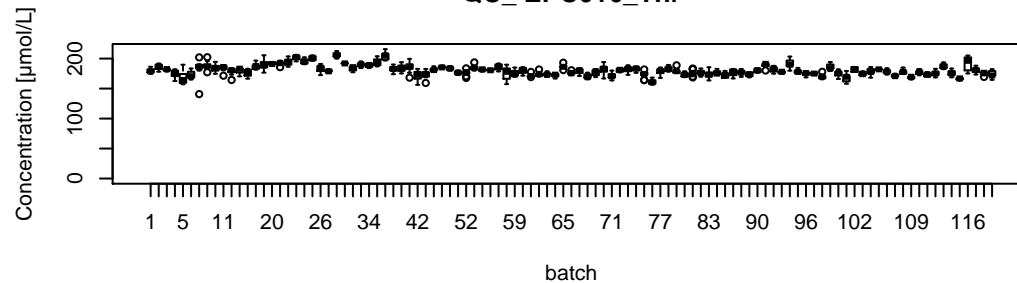

QC\_EPC017\_Taurine

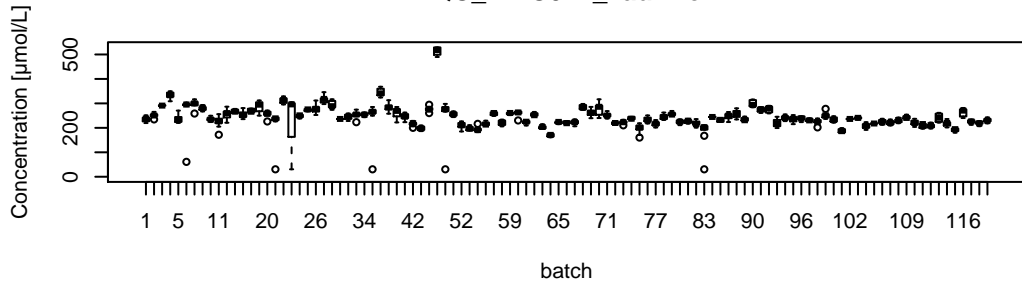

QC\_EPC018\_Pipecolate

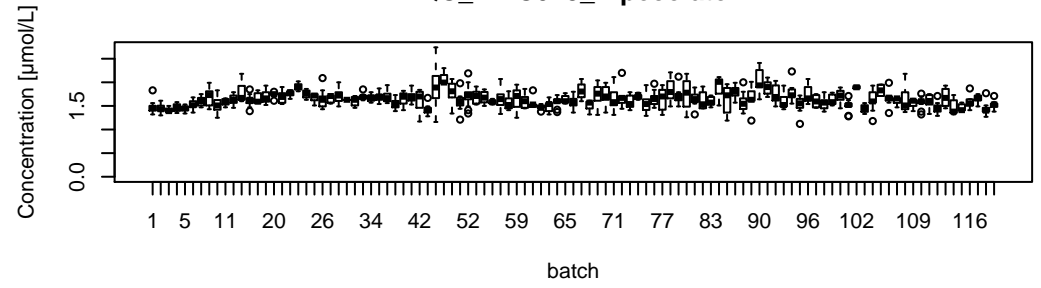

QC\_EPC019\_Hydroxyproline

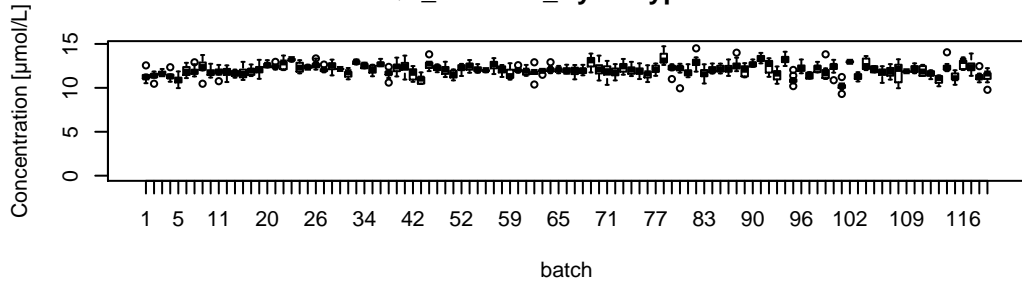

QC\_EPC020\_Creatine

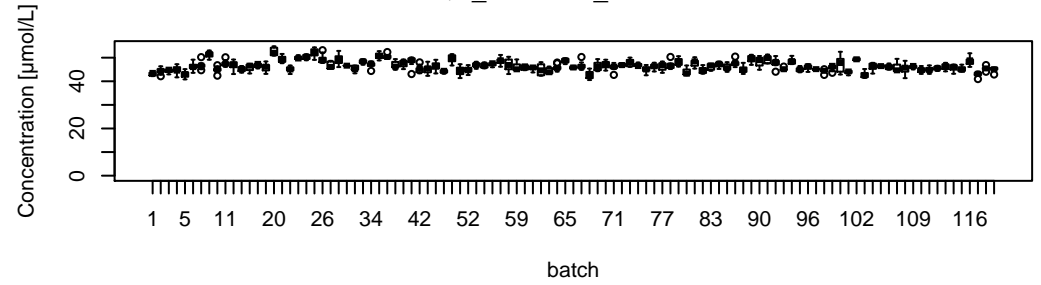

QC\_EPC021\_Ile

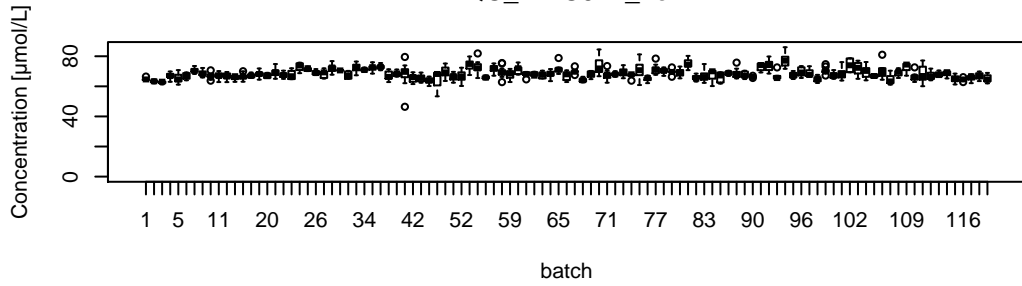

QC\_EPC022\_Leu

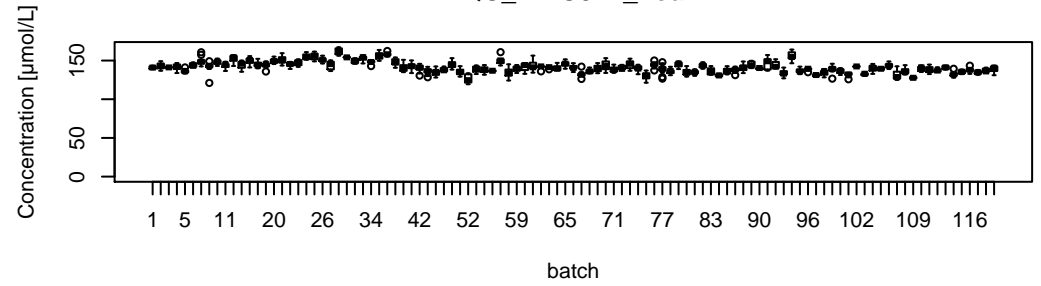

QC\_EPC023\_Asn

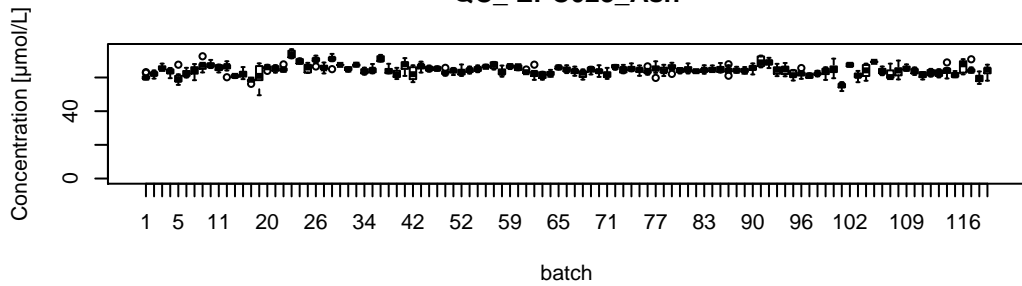

QC\_EPC024\_Ornithine

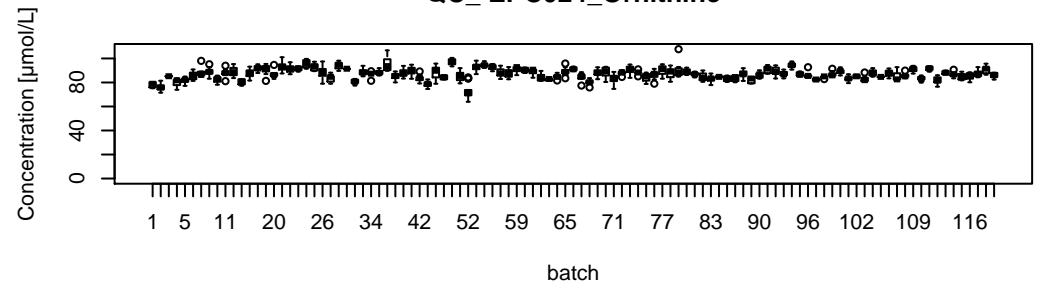

**QC\_EPC025\_Asp**

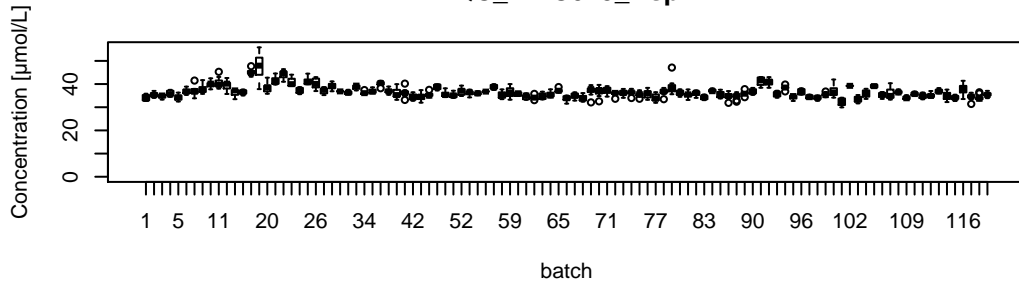

**QC\_EPC026\_Hypoxanthine**

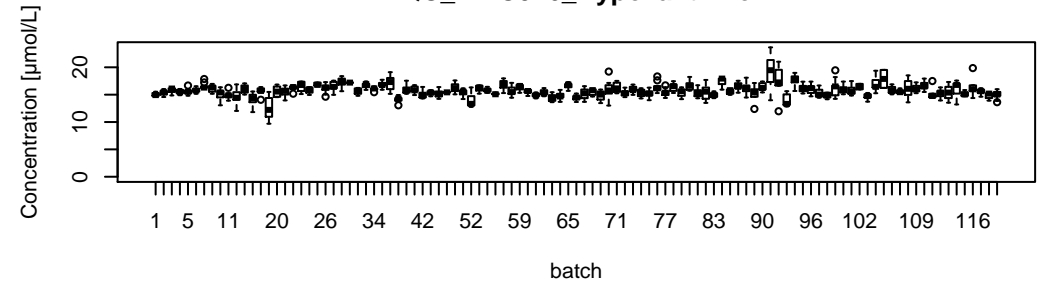

**QC\_EPC027\_1-Methylnicotinamide**

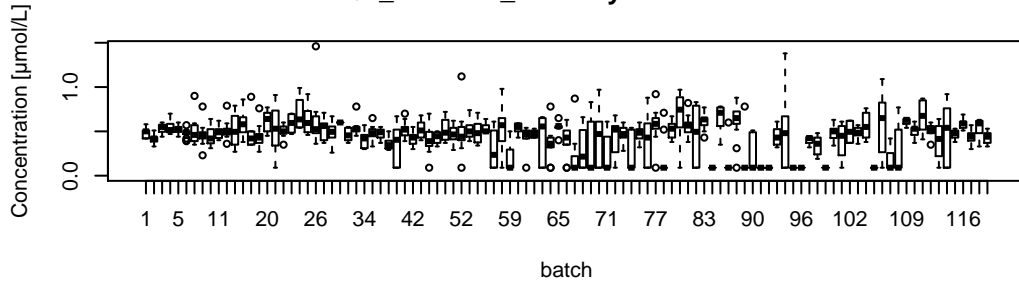

**QC\_EPC028\_Trigonelline**

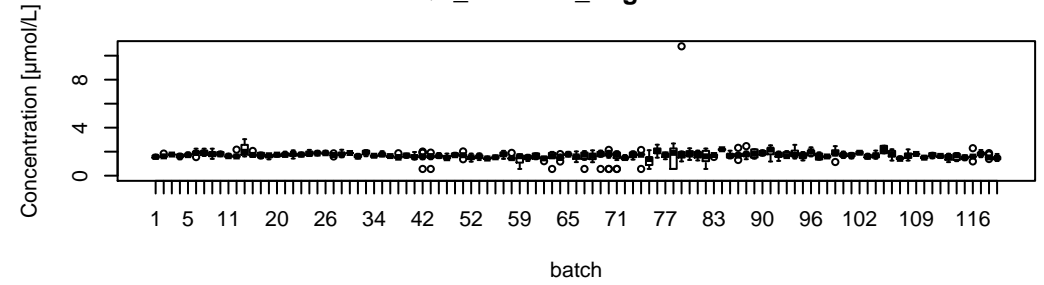

**QC\_EPC029\_proline betaine**

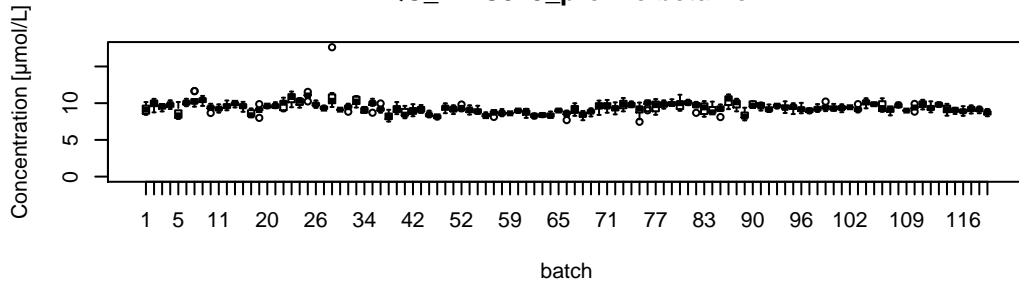

**QC\_EPC030\_gamma-Butyrobetaine**

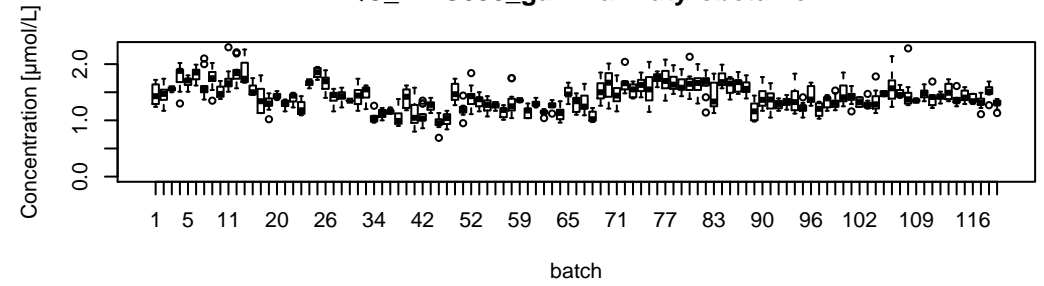

**QC\_EPC031\_Gln**

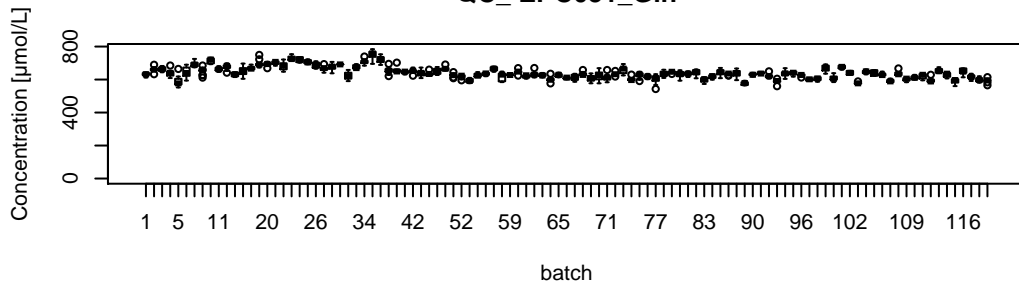

**QC\_EPC032\_Lys**

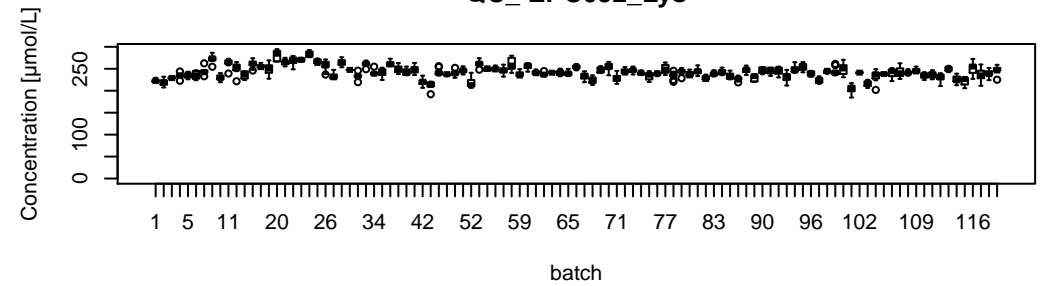

**QC\_EPC033\_Glu**

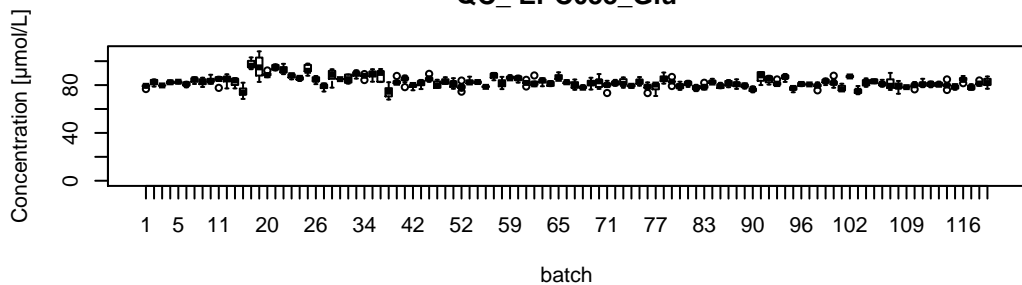

**QC\_EPC034\_Met**

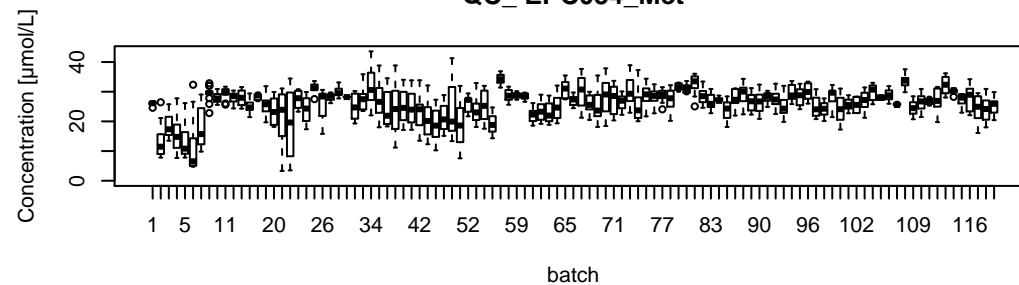

**QC\_EPC035\_Triethanolamine**

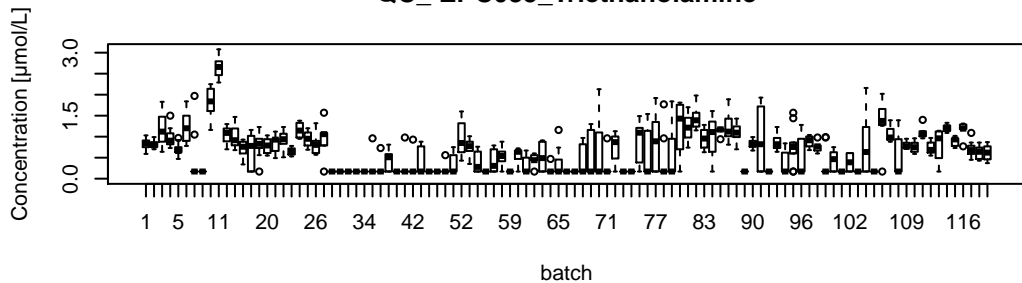

**QC\_EPC036\_His**

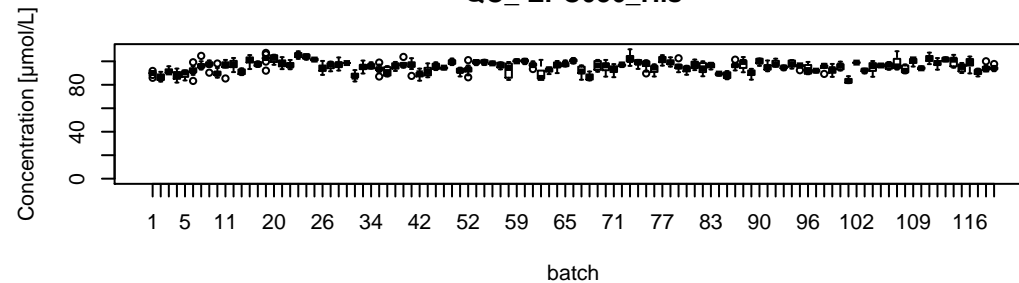

**QC\_EPC037\_alpha-Aminoadipate**

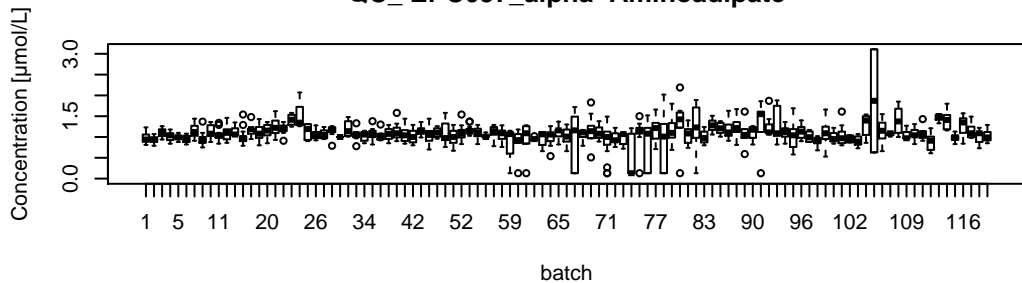

**QC\_EPC038\_Carnitine**

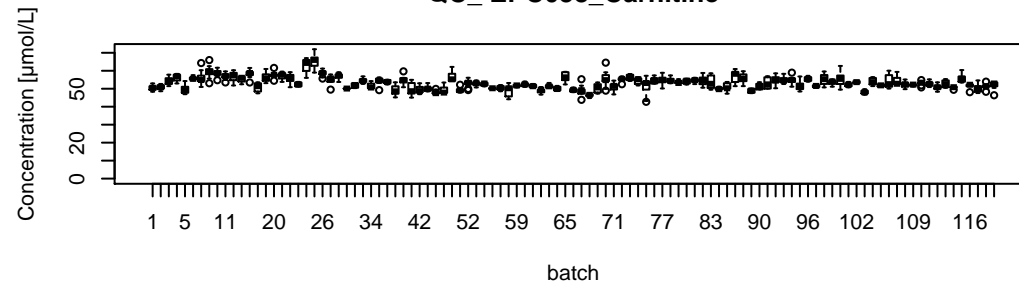

**QC\_EPC039\_Phe**

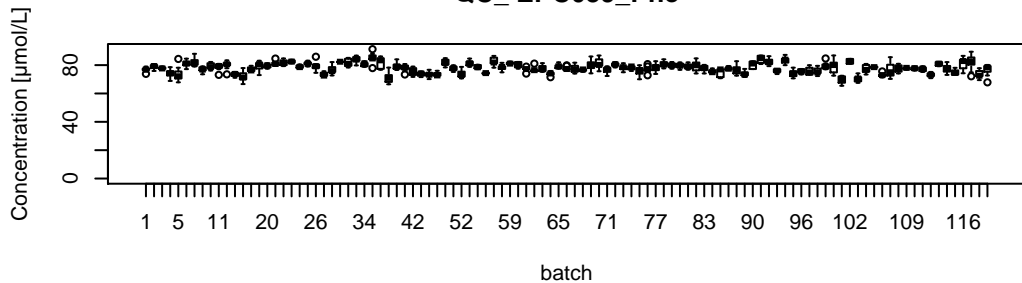

**QC\_EPC040\_3-Methylhistidine**

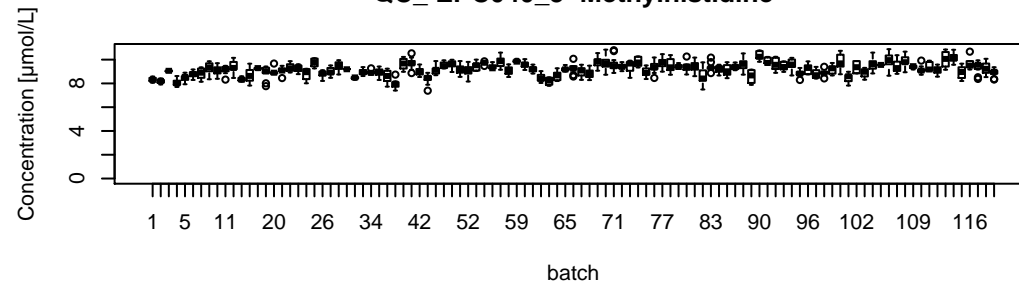

**QC\_EPC041\_Arg**

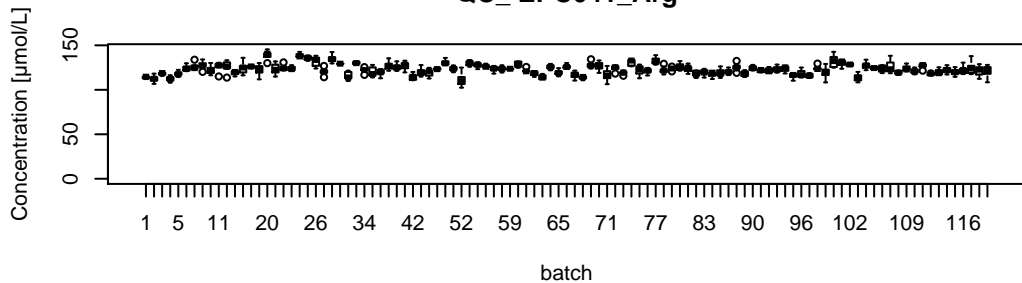

**QC\_EPC042\_Guanidinosuccinate**

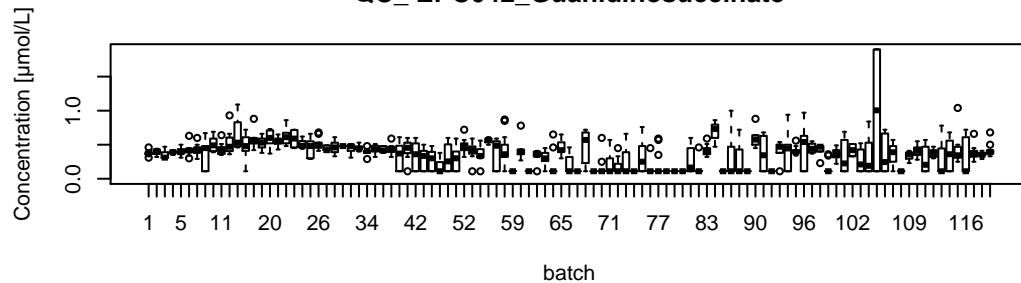

**QC\_EPC043\_Indole-3-acetate**

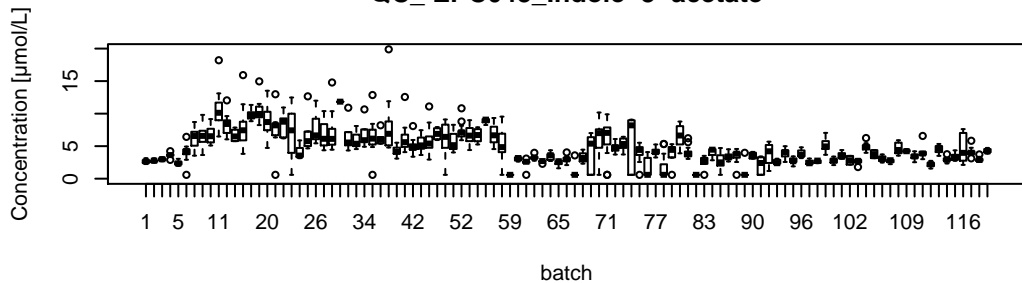

**QC\_EPC044\_Citrulline**

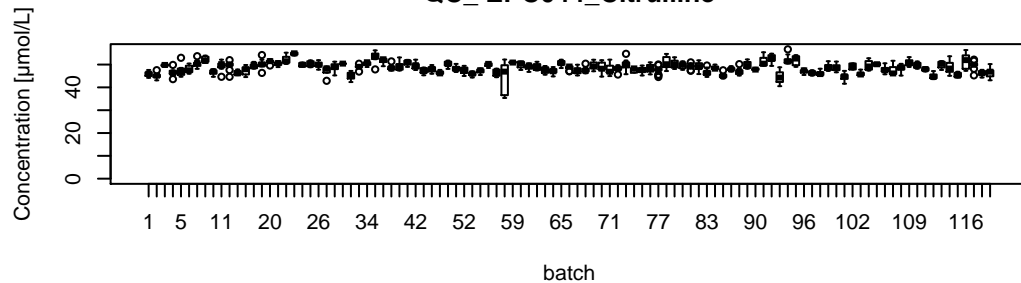

**QC\_EPC045\_Tyr**

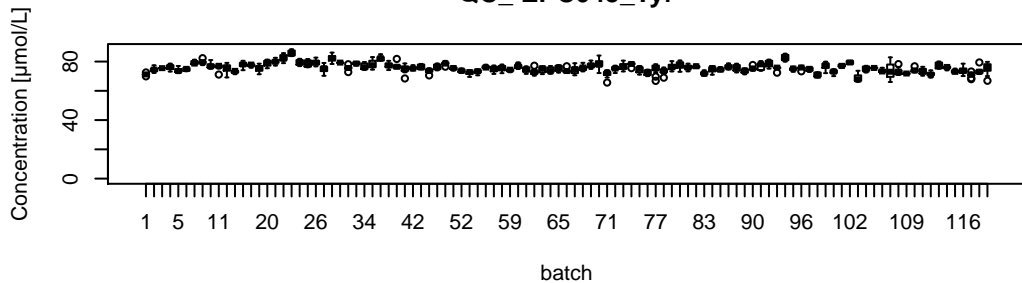

**QC\_EPC046\_SDMA**

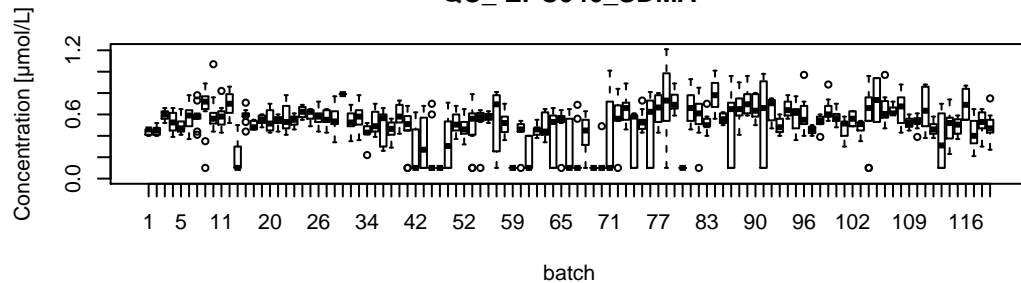

**QC\_EPC047\_ADMA**

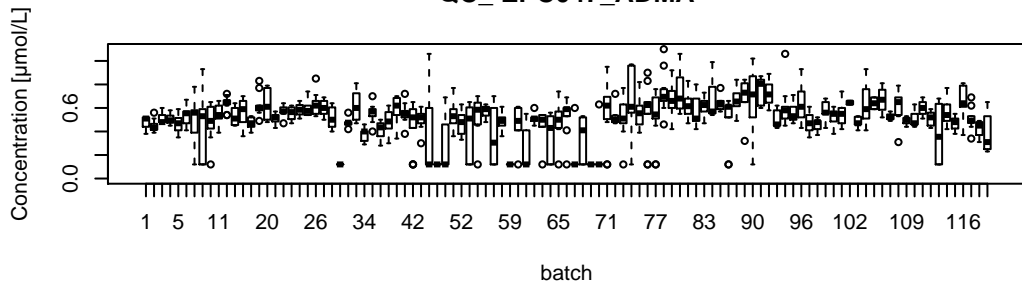

**QC\_EPC048\_o-Acetylcarnitine**

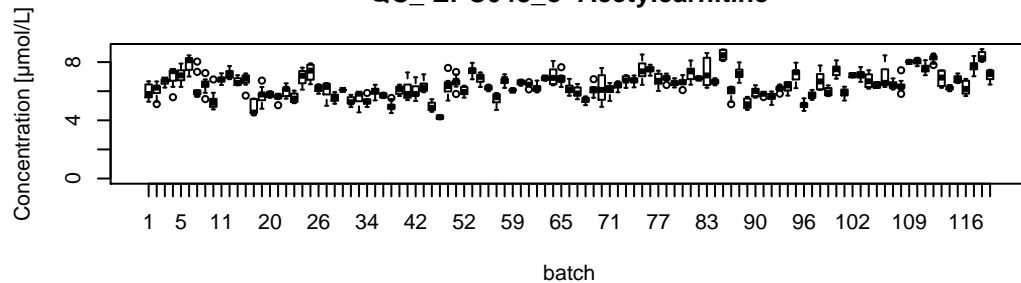

QC\_EPC049\_Trp

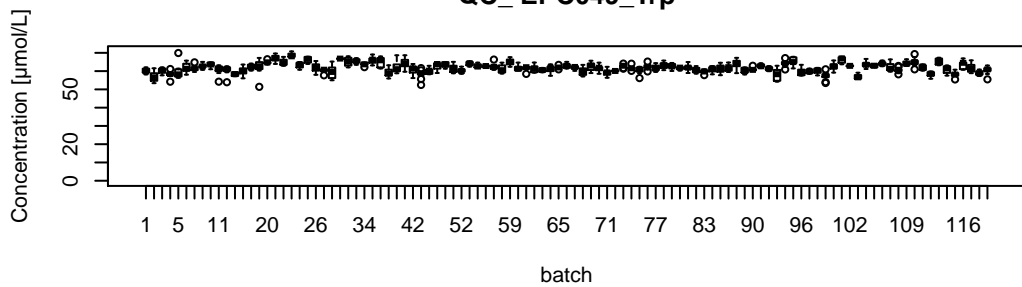

QC\_EPC050\_Kynurenine

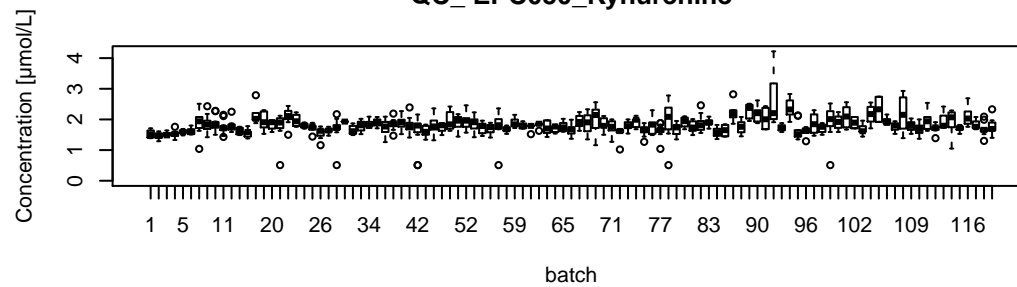

QC\_EPC051\_CSSG

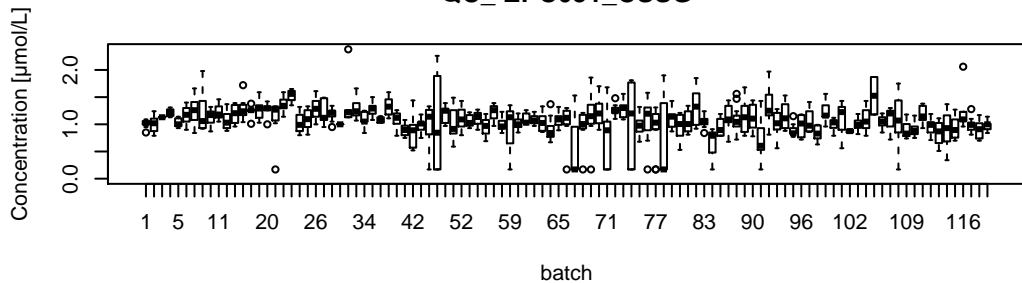

QC\_EPC052\_Cystine

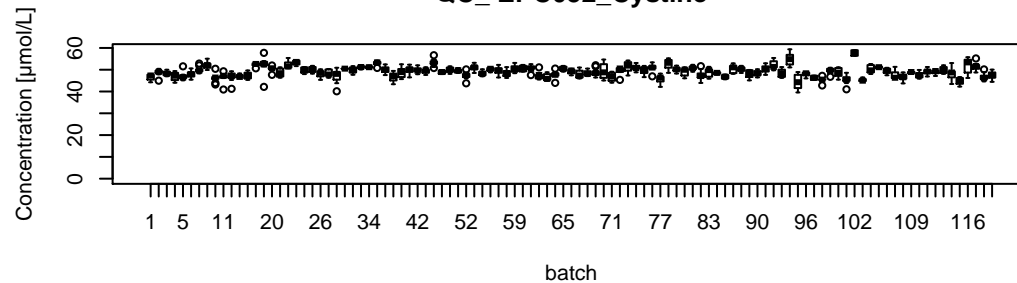

QC\_EPC053\_Uridine

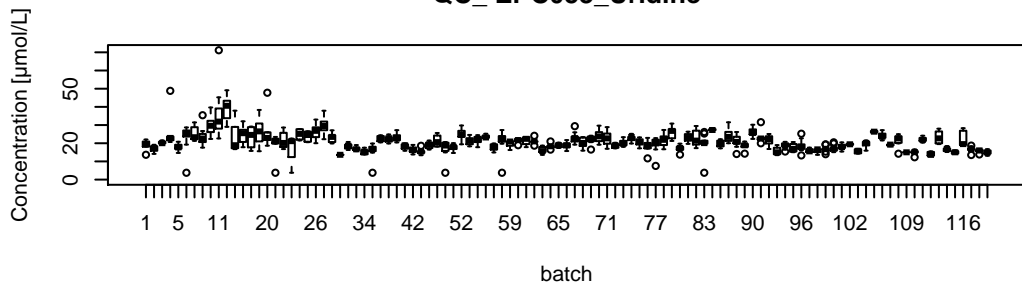

QC\_EPC054\_Glycerophosphorylcholine

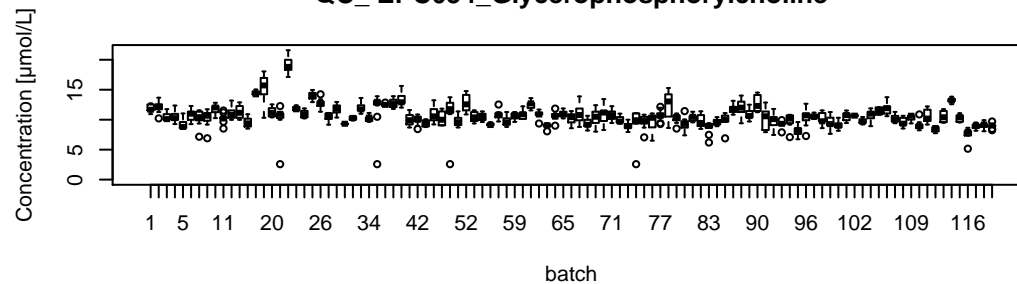

Supplement: pone.0191230.s002.pdf [file pone.0191230.s002.pdf]
