# Supplementary material for: Reliability of plasma polar metabolite concentrations in a large-scale cohort study using capillary electrophoresis-mass spectrometry
Source: PubMed Central journal article supplement (PMC5773198; doi:10.1371/journal.pone.0191230), 2018-01-18

**QC\_EPA001\_Pyruvate**

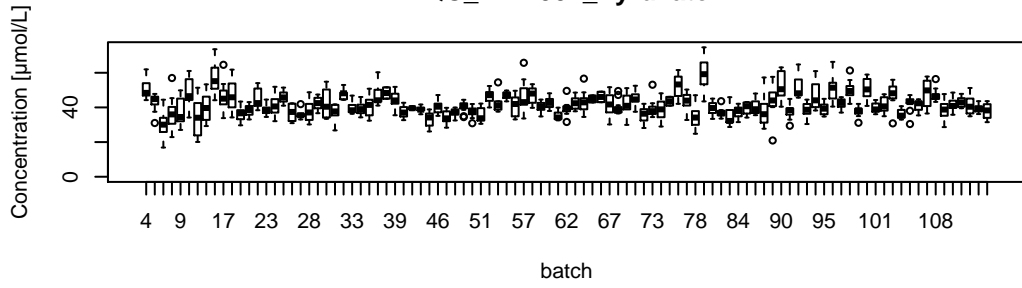

**QC\_EPA002\_Lactate**

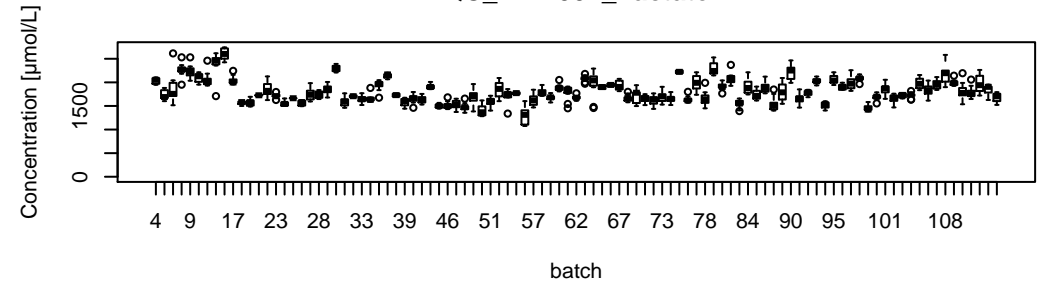

**QC\_EPA003\_2-Oxobutyrate**

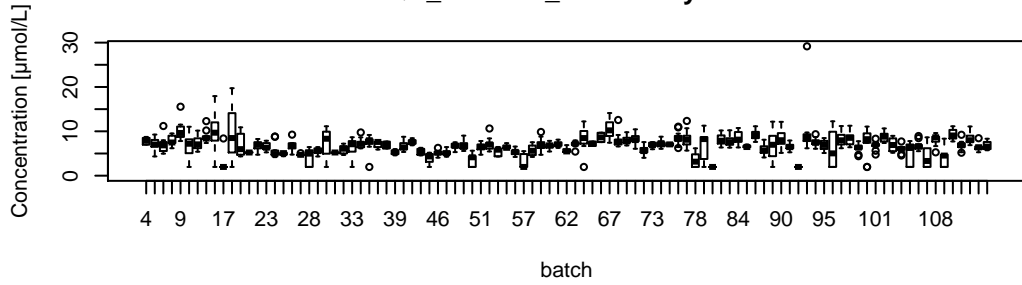

**QC\_EPA004\_Malonate**

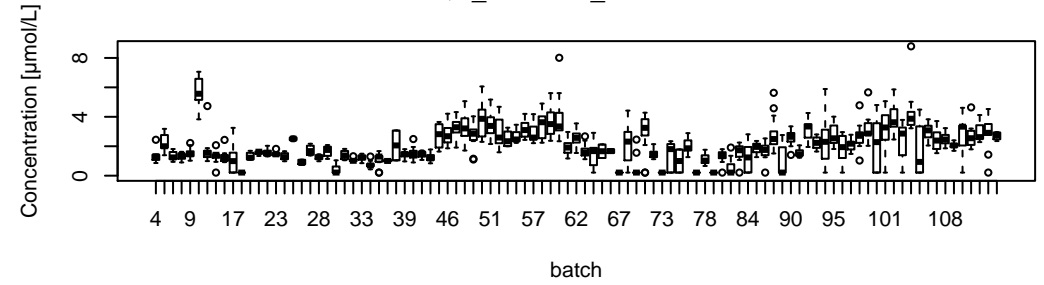

**QC\_EPA005\_2-Hydroxybutyrate**

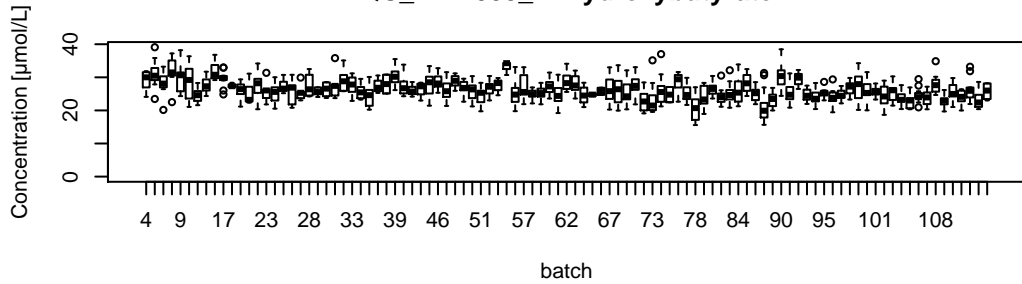

**QC\_EPA006\_3-Hydroxybutyrate**

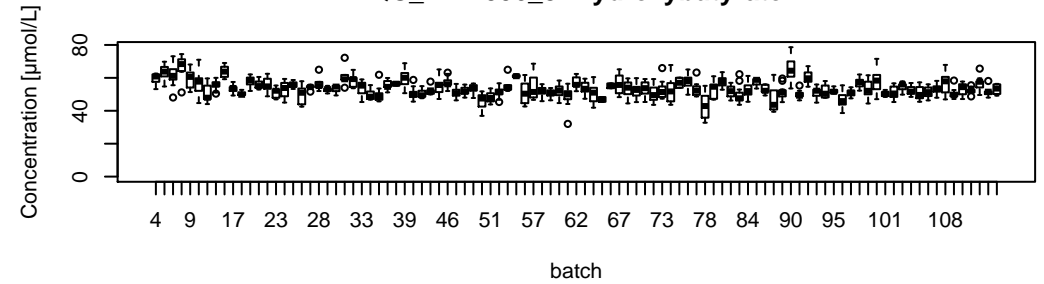

**QC\_EPA007\_Fumarate**

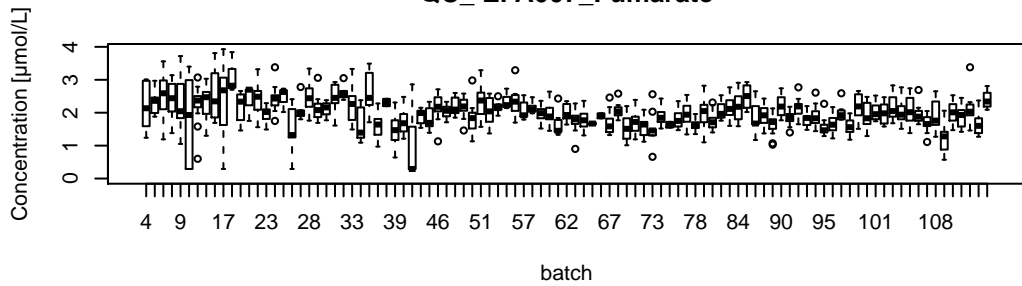

**QC\_EPA008\_2-Oxoisopentanoate**

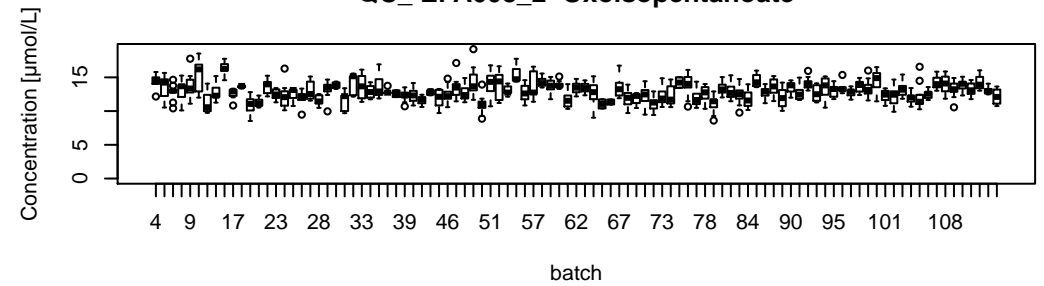

**QC\_EPA009\_Hexanoate**

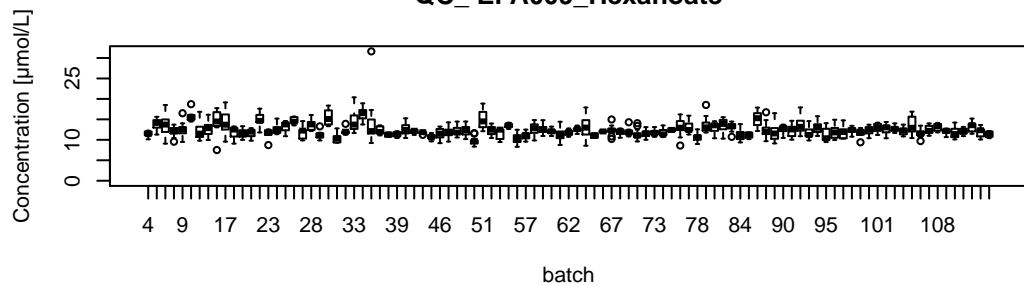

**QC\_EPA010\_Succinate**

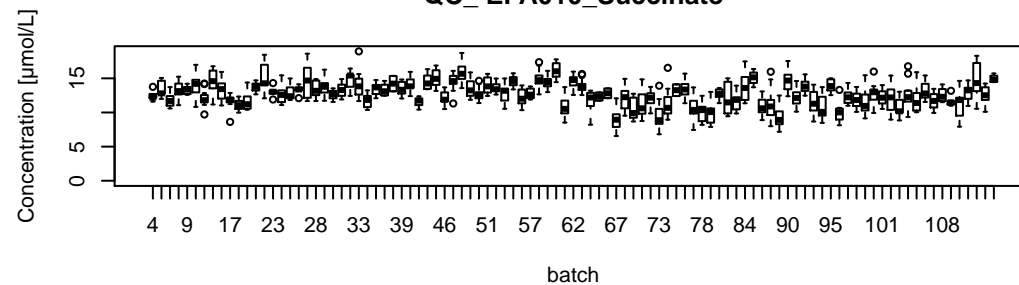

**QC\_EPA011\_Isethionate**

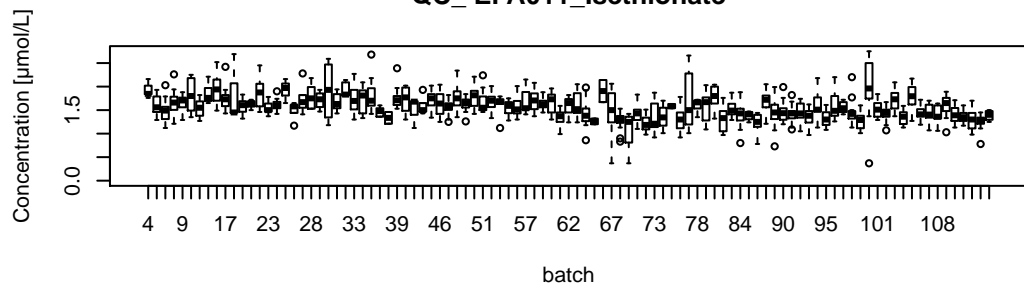

**QC\_EPA012\_5-Oxoproline**

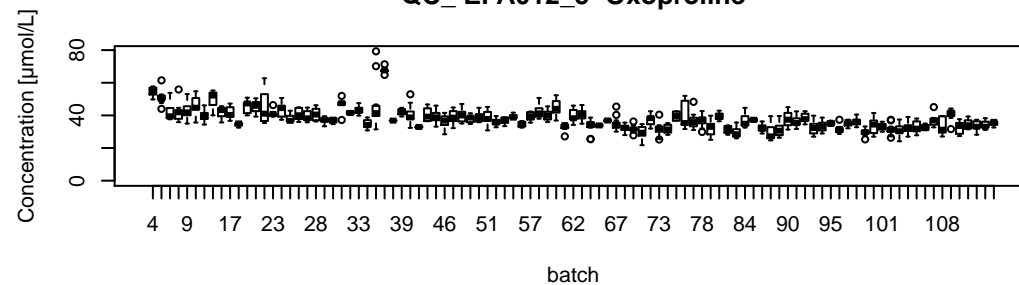

**QC\_EPA013\_Citraconate**

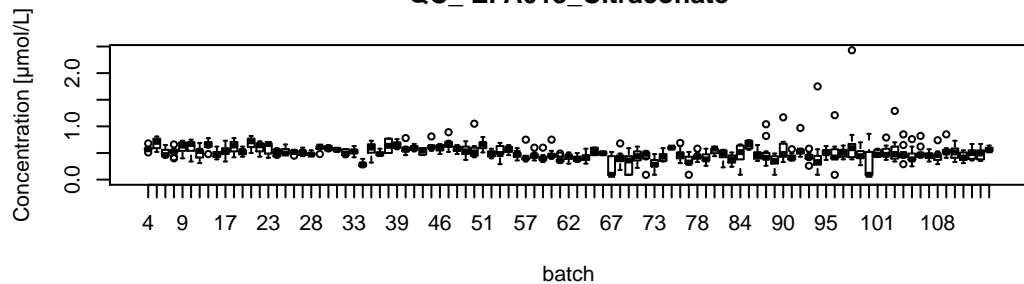

**QC\_EPA014\_4-Methyl-2-oxopentanoate**

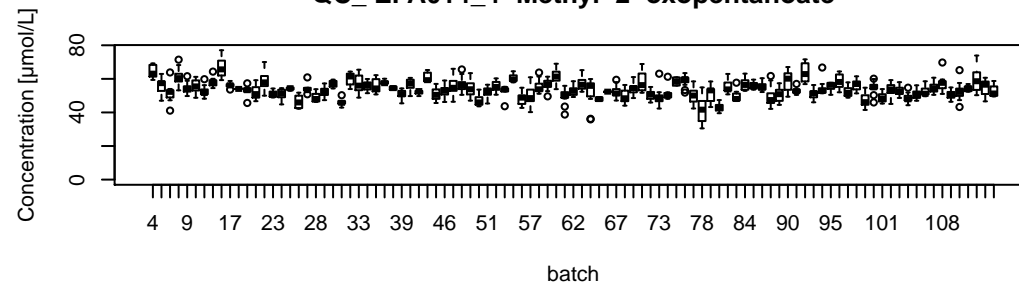

**QC\_EPA015\_4-Acetylbutyrate**

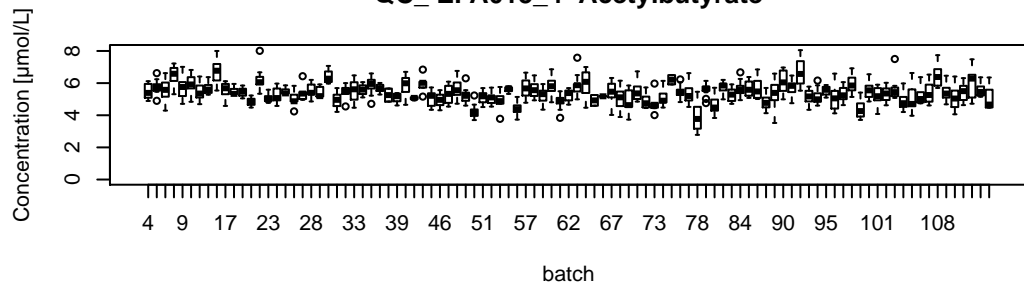

**QC\_EPA016\_Heptanoate**

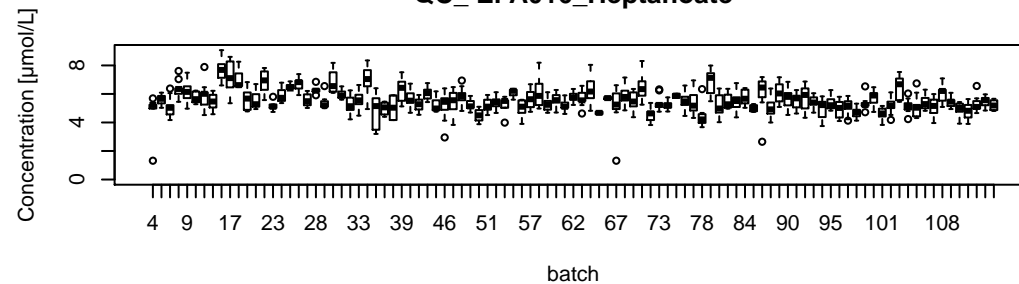

**QC\_EPA017\_Glutarate**

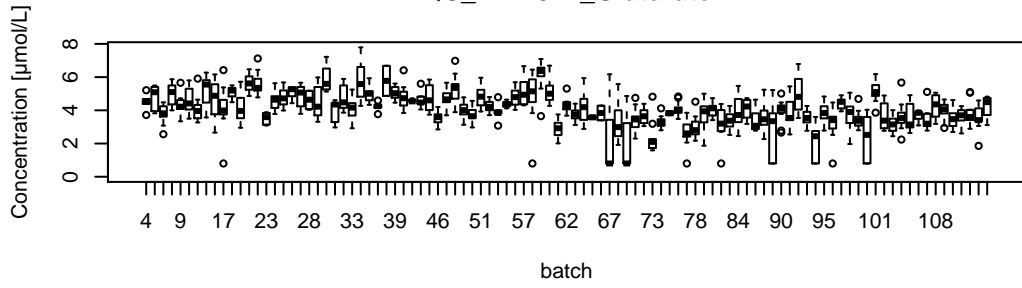

**QC\_EPA018\_Malate**

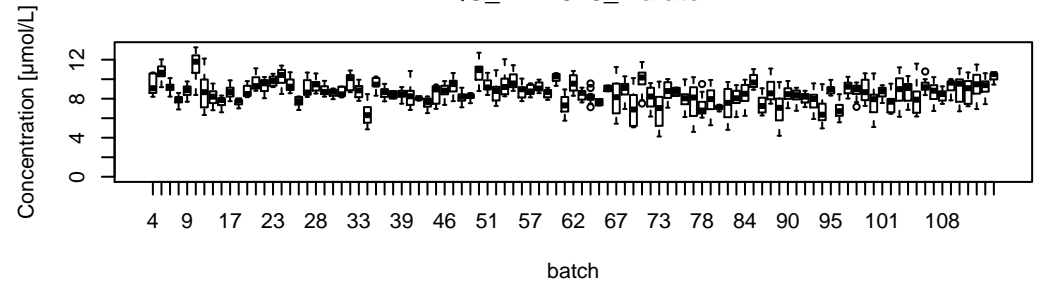

**QC\_EPA019\_threonate**

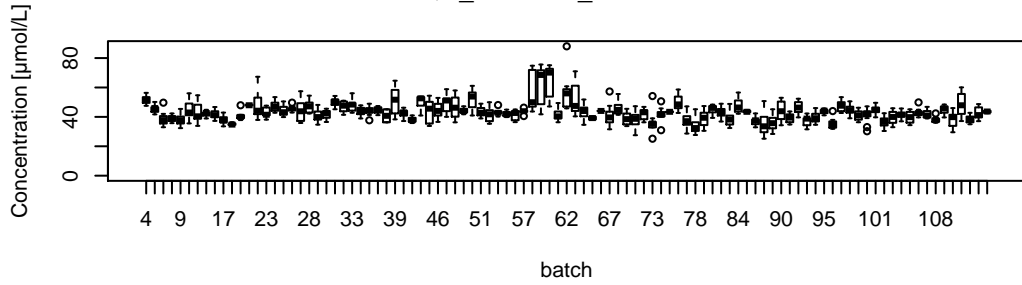

**QC\_EPA020\_Ethanolamine phosphate**

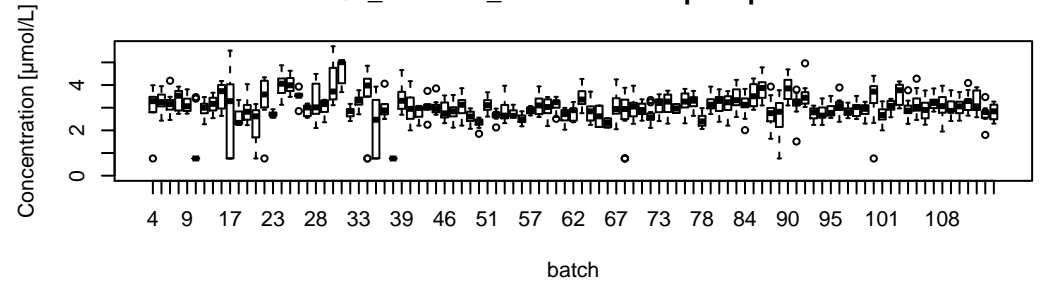

**QC\_EPA021\_Octanoate**

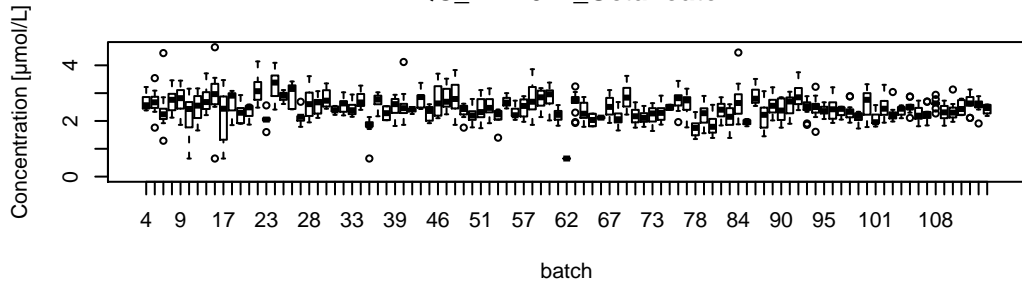

**QC\_EPA022\_2-Oxoglutarate**

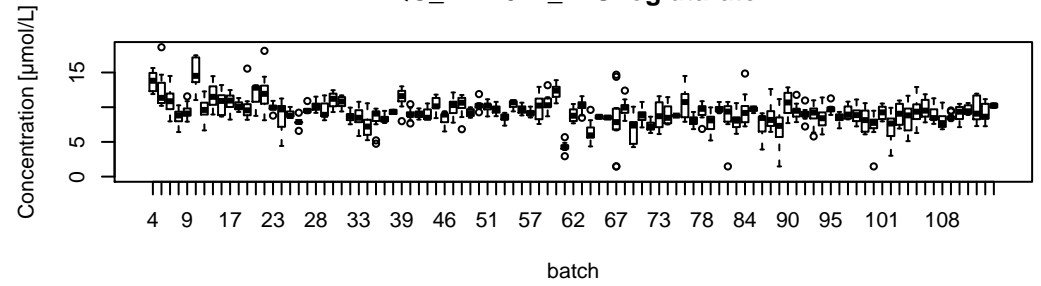

**QC\_EPA023\_Pelargonate**

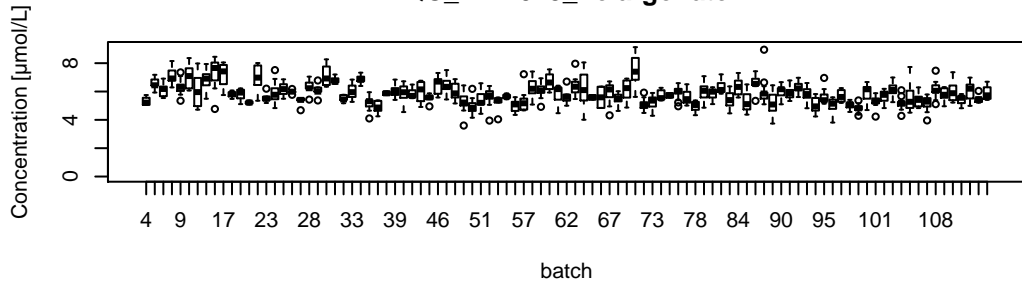

**QC\_EPA024\_Terephthalate**

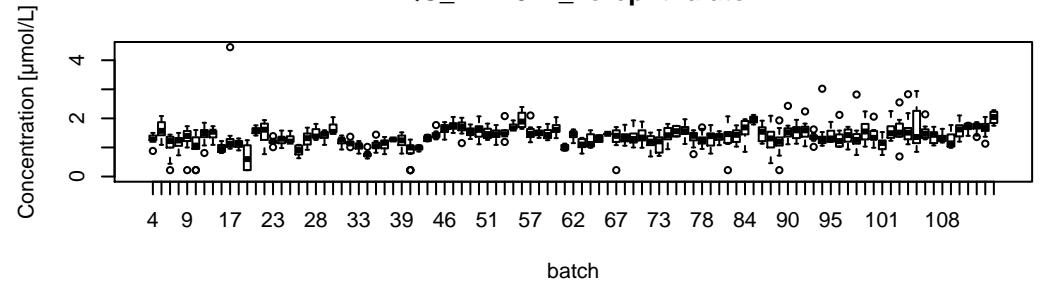

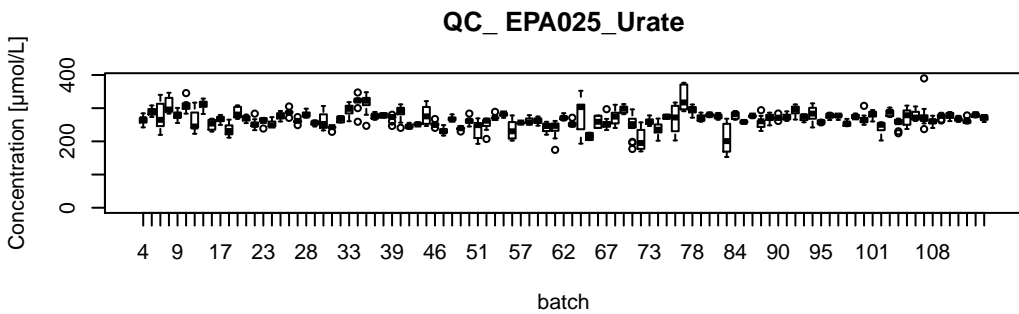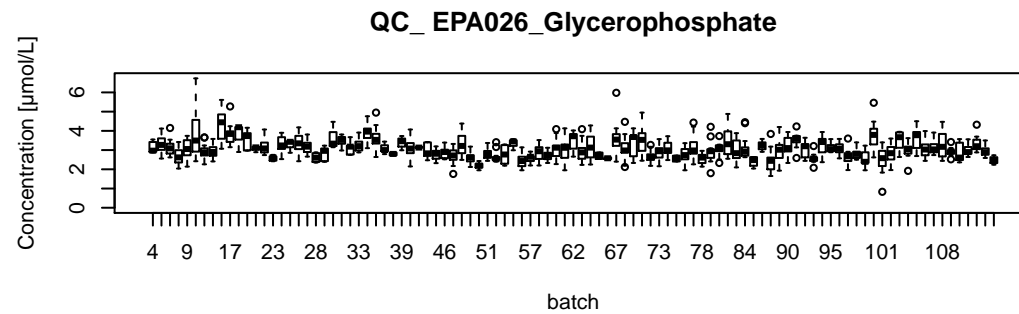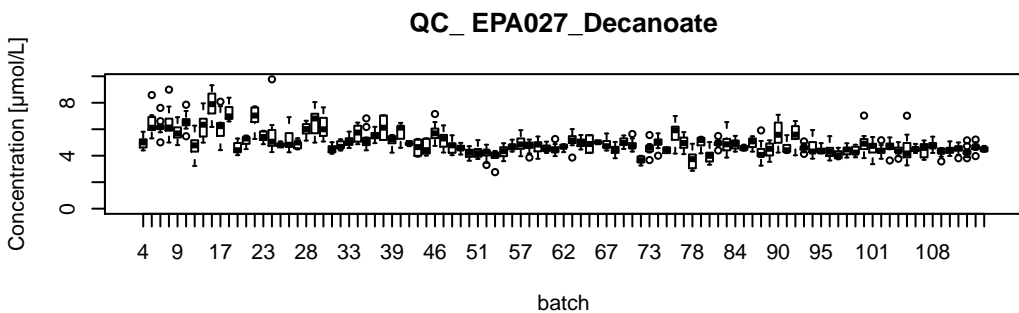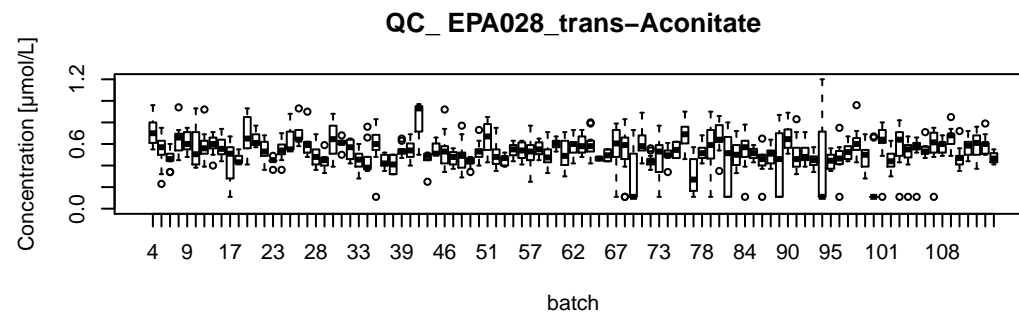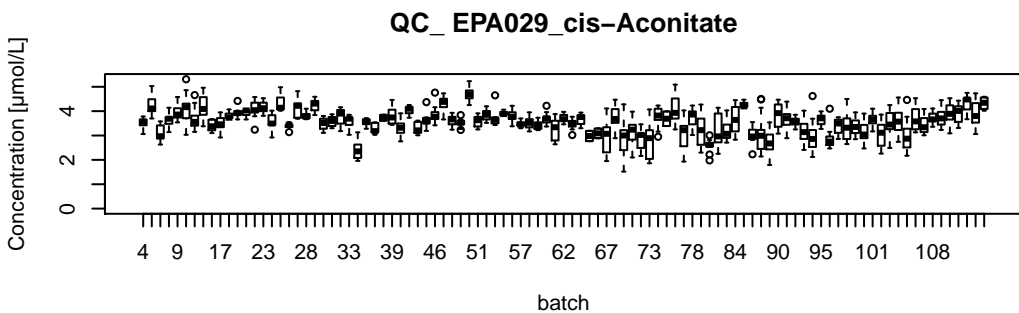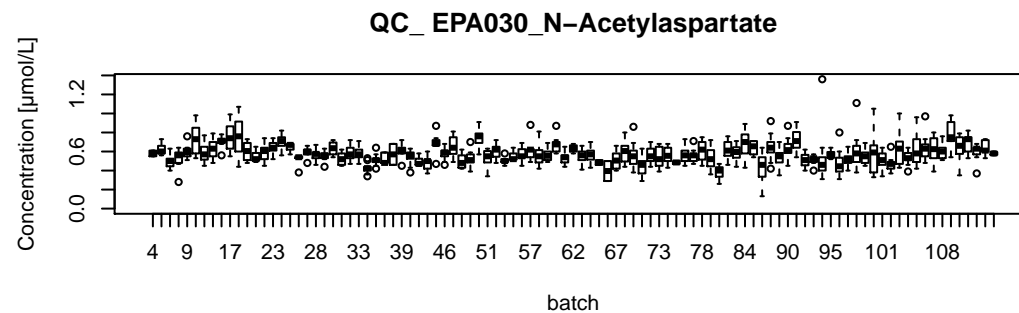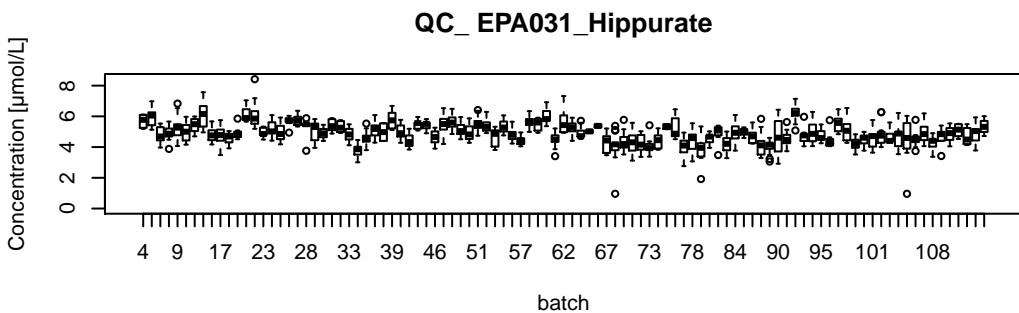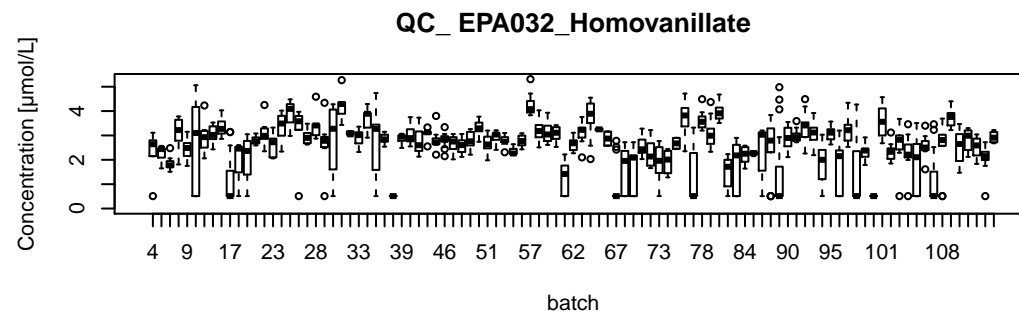

**QC\_EPA033\_Azela**

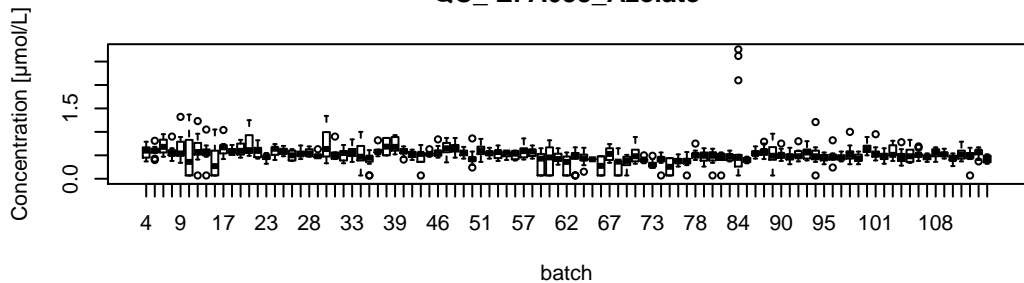

**QC\_EPA034\_Isocitrate**

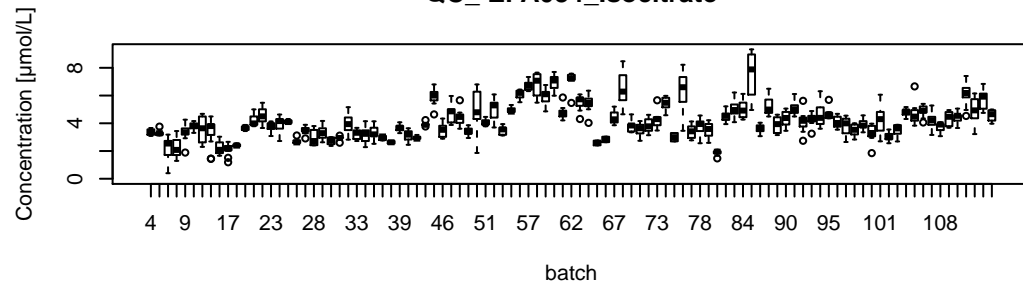

**QC\_EPA035\_Citrate**

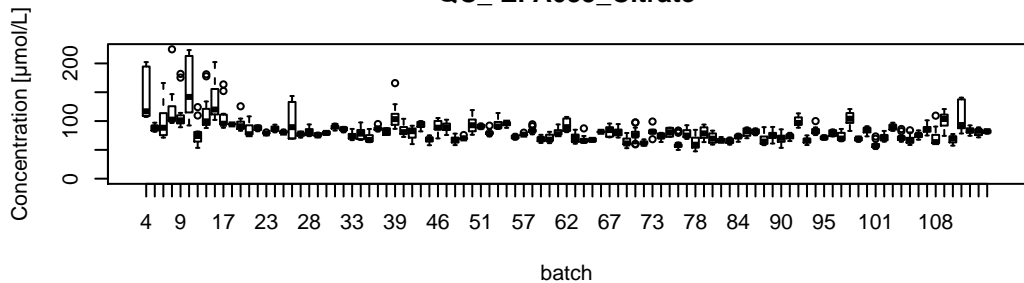

**QC\_EPA036\_Quinate**

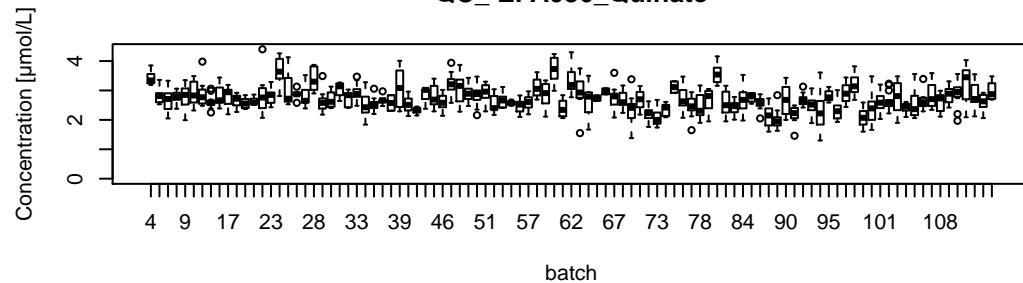

**QC\_EPA037\_Glucuronate**

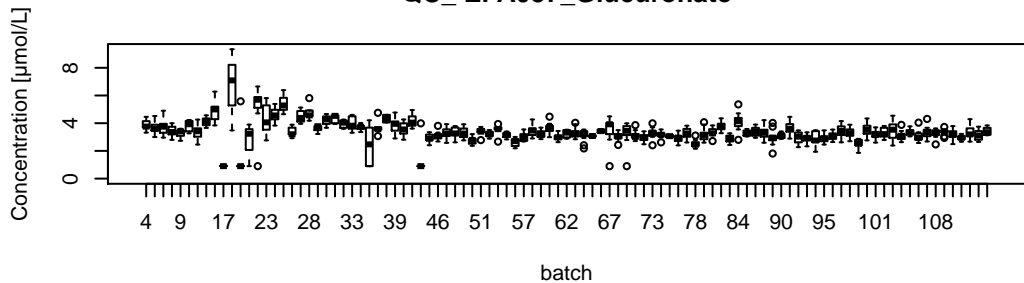

**QC\_EPA038\_Cysteine S-sulfate**

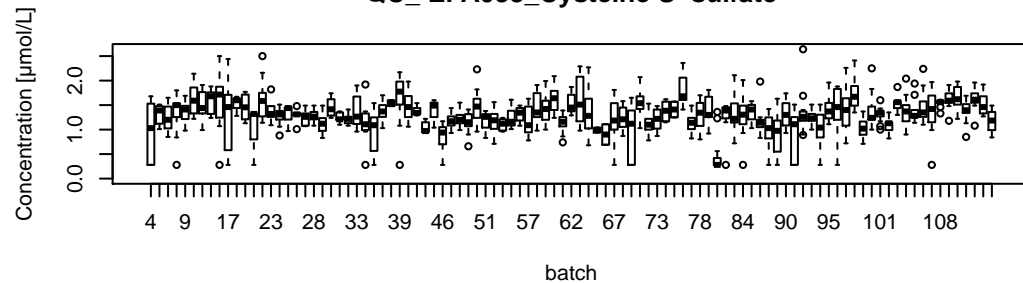

**QC\_EPA039\_Mucate**

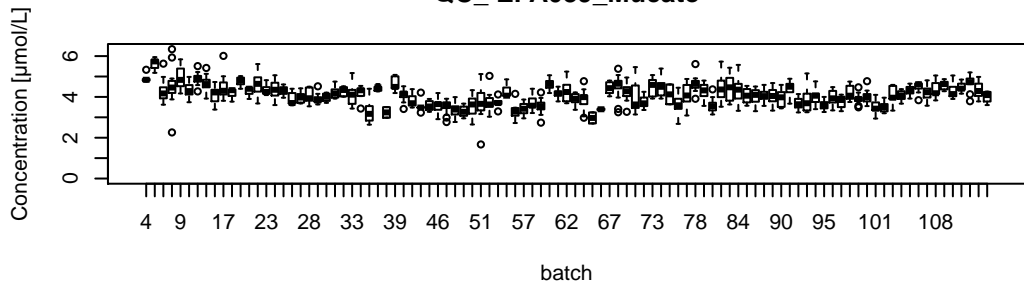

**QC\_EPA040\_3-Indoxyl sulfate**

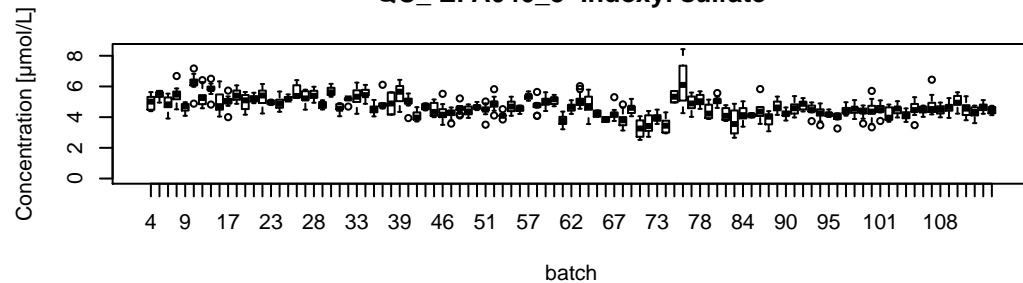

Supplement: pone.0191230.s003.pdf [file pone.0191230.s003.pdf]
